# Supplementary material
Source: publisher figshare collection journal article supplement (https://acs.figshare.com/ndownloader/files/3607182)
Supplement: Supplementary file 1 [file 3607182]

## Supporting Information

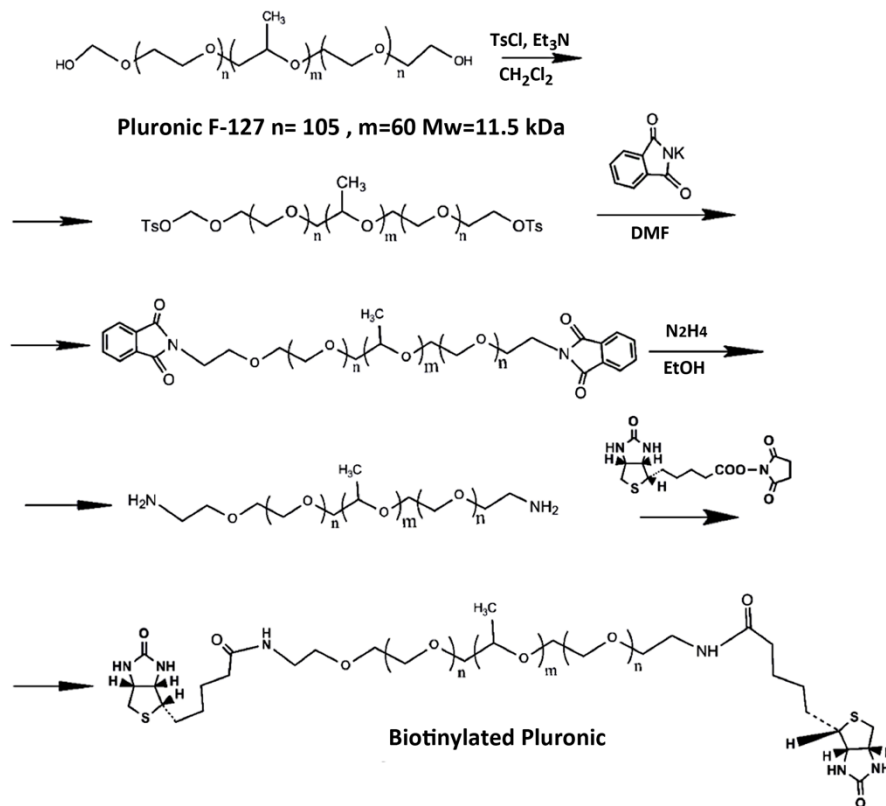

**Supplementary Scheme 1.** Chemical synthesis for the dual biotinylation of PF127.

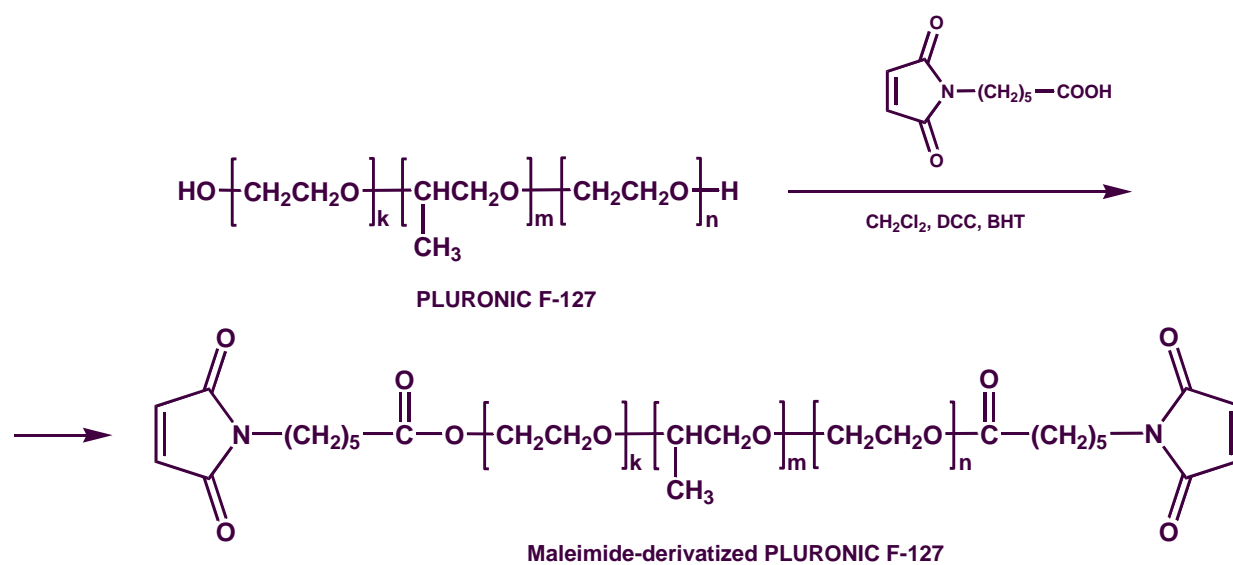

**Supplementary Scheme 2.** Chemical synthesis for the dual maleimide-derivatization of PF127.

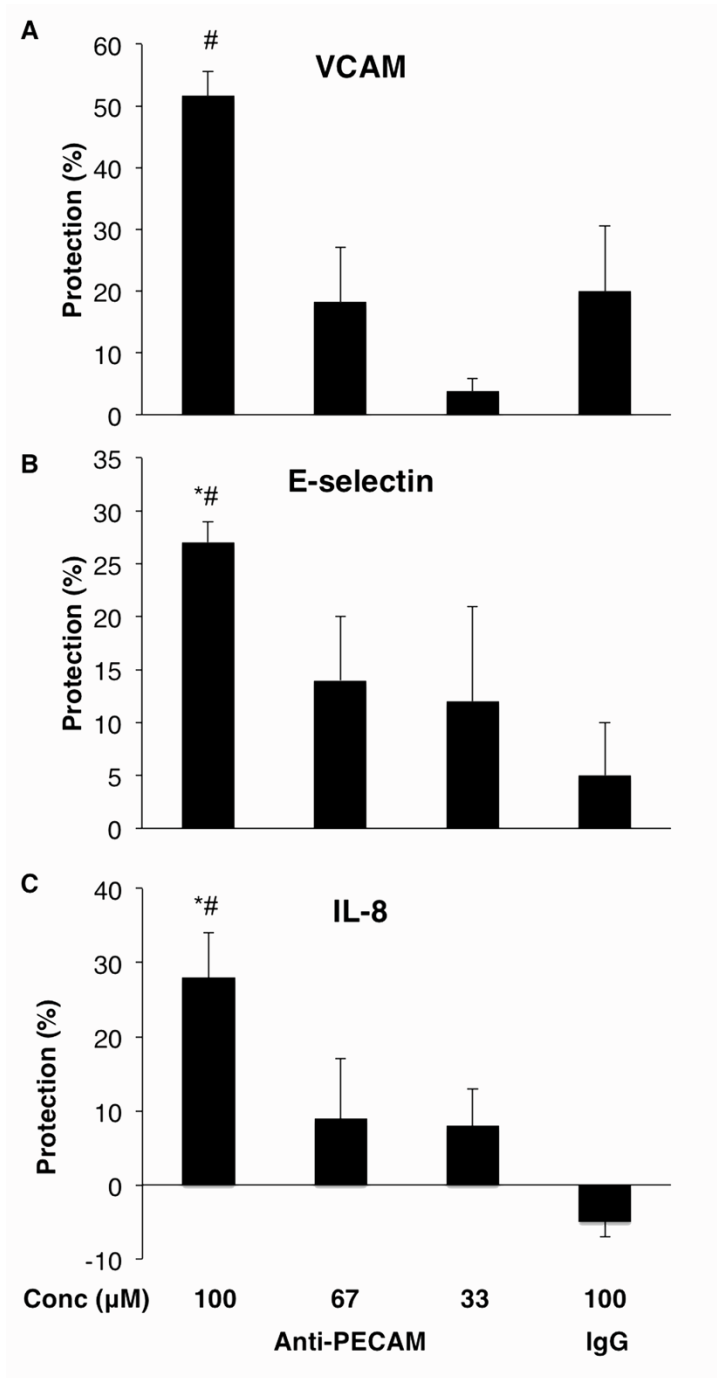

**Supplementary Figure 1.** Effect of dose on the protective effect of targeted (33-100 μM) and control TNPs (100 μM) against pro-inflammatory endothelial activation as assessed by VCAM, E-selectin, and IL-8 RNA gene expression. Statistical significance vs the TNF control at the  $p < 0.05$  level is denoted by #. Statistical significance between the IgG and the anti-PECAM 100 μm samples at the  $p < 0.05$  level is denoted by \*. Exact values are as follows: VCAM #,  $p = 0.003$ ; E-selectin #,  $p = 0.003$ ; E-selectin \*,  $p = 0.029$ ; IL-8 #,  $p = 0.022$ ; IL-8 \*,  $p = 0.017$  (Mean $\pm$ SD,  $n = 3$ )

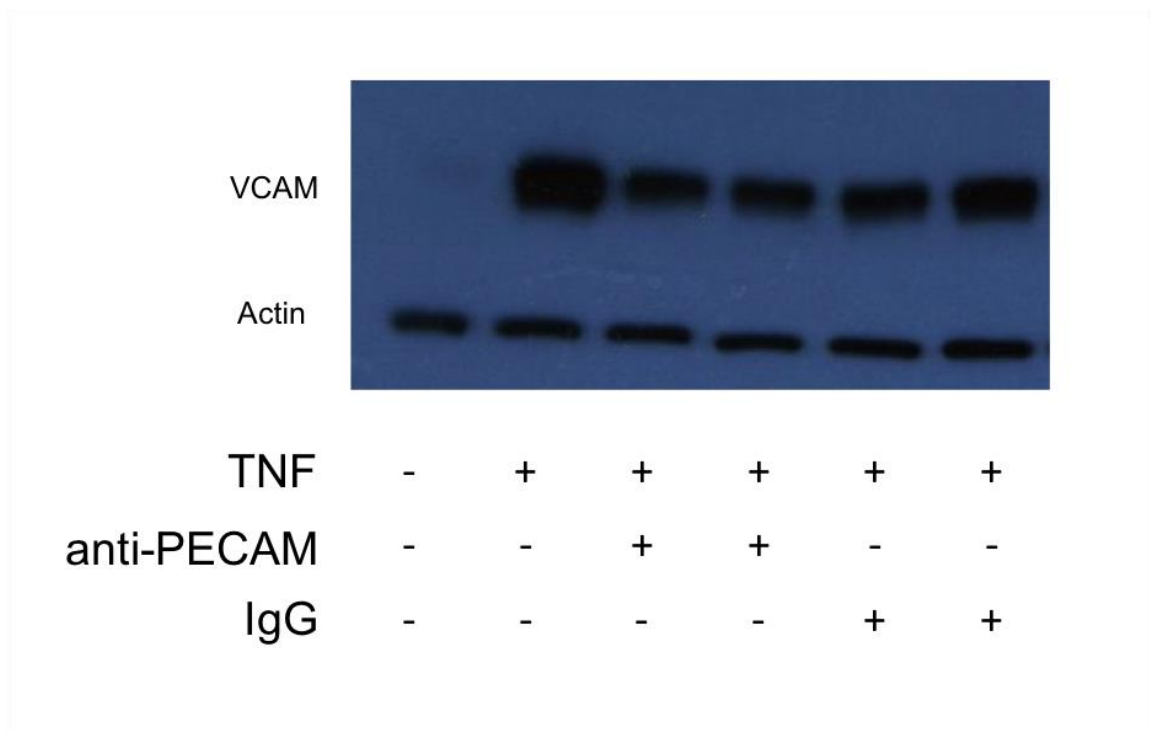

**Supplementary Figure 2.** Representative western blot for VCAM expression.
